# Supplementary material for: Structure and Function of Oral Microbial Community in Periodontitis Based on Integrated Data
Source: Front Cell Infect Microbiol. 2021 Jun 17;11:663756. doi: 10.3389/fcimb.2021.663756 (PMC8248787; doi:10.3389/fcimb.2021.663756)
Supplement: Supplementary file 4 [file Table_3.xlsx]

## Sheet: correlation_table (1)
Taxon1	Taxon2	Correlation	P.value	Statistic
TG5	Treponema	0.7191	<0.01	3.25616e+07
Desulfobulbus	TG5	0.6455	<0.01	4.10943e+07
Tannerella	Treponema	0.5774	<0.01	4.89864e+07
Desulfobulbus	Treponema	0.5446	<0.01	5.27938e+07
Capnocytophaga	Not_Assigned	0.5374	<0.01	5.36286e+07
Tannerella	TG5	0.5364	<0.01	5.37365e+07
Capnocytophaga	Kingella	0.5071	<0.01	5.71394e+07
Kingella	Not_Assigned	0.4941	<0.01	5.86382e+07
Kingella	Rothia	0.4634	<0.01	6.21977e+07
Corynebacterium	Rothia	0.4582	<0.01	6.28067e+07
Streptococcus	Veillonella	0.4462	<0.01	6.41987e+07
Rothia	Streptococcus	0.4448	<0.01	6.43566e+07
Dialister	Prevotella	0.4427	<0.01	6.46024e+07
Desulfobulbus	Tannerella	0.4417	<0.01	6.47204e+07
Corynebacterium	Lautropia	0.4357	<0.01	6.54092e+07
Filifactor	Treponema	0.4325	<0.01	6.57855e+07
Peptococcus	Treponema	0.429	<0.01	6.61871e+07
Actinomyces	Rothia	0.4137	<0.01	6.79577e+07
Porphyromonas	Tannerella	0.4076	<0.01	6.86665e+07
Paludibacter	Treponema	0.4049	<0.01	6.89859e+07
Campylobacter	Fusobacterium	0.4016	<0.01	6.93674e+07
Desulfobulbus	Vestibaculum	0.3982	<0.01	6.9759e+07
Mogibacterium	TG5	0.3982	<0.01	6.97635e+07
Rothia	Not_Assigned	0.3957	<0.01	7.00458e+07
Porphyromonas	TG5	0.393	<0.01	7.03635e+07
Peptococcus	TG5	0.3898	<0.01	7.073e+07
Paludibacter	Tannerella	0.3885	<0.01	7.08824e+07
Mogibacterium	Treponema	0.3855	<0.01	7.12353e+07
Fusobacterium	Selenomonas	0.3812	<0.01	7.1724e+07
Bacteroides	TG5	0.3793	<0.01	7.19484e+07
Porphyromonas	Treponema	0.377	<0.01	7.22125e+07
Aggregatibacter	Not_Assigned	0.3765	<0.01	7.22704e+07
Desulfobulbus	Mogibacterium	0.3711	<0.01	7.28978e+07
Corynebacterium	Streptococcus	0.3695	<0.01	7.30897e+07
Kingella	Veillonella	0.3687	<0.01	7.31844e+07
Streptococcus	Not_Assigned	0.3673	<0.01	7.33455e+07
Bacteroides	Treponema	0.3622	<0.01	7.39374e+07
Capnocytophaga	Cardiobacterium	0.3612	<0.01	7.40486e+07
Peptococcus	Porphyromonas	0.359	<0.01	7.43001e+07
TG5	Vestibaculum	0.3532	<0.01	7.4975e+07
Corynebacterium	Fusobacterium	0.3492	<0.01	7.54446e+07
Bacteroides	Tannerella	0.3478	<0.01	7.55959e+07
Porphyromonas	Vestibaculum	0.3463	<0.01	7.5781e+07
Filifactor	TG5	0.3437	<0.01	7.60742e+07
Fusobacterium	Paludibacter	0.3418	<0.01	7.62948e+07
Dialister	Parvimonas	0.3414	<0.01	7.63432e+07
Tannerella	Vestibaculum	0.3406	<0.01	7.64312e+07
Actinomyces	Veillonella	0.3405	<0.01	7.64436e+07
Paludibacter	TG5	0.3396	<0.01	7.65495e+07
Aggregatibacter	Capnocytophaga	0.3386	<0.01	7.66684e+07
Parvimonas	Treponema	0.3359	<0.01	7.69824e+07
Lautropia	Streptococcus	0.3352	<0.01	7.70621e+07
Lautropia	Rothia	0.3328	<0.01	7.73364e+07
Fusobacterium	Prevotella	0.3314	<0.01	7.7505e+07
Actinomyces	Kingella	0.3302	<0.01	7.76403e+07
Treponema	Vestibaculum	0.3293	<0.01	7.77488e+07
Fusobacterium	Tannerella	0.3274	<0.01	7.79654e+07
Parvimonas	TG5	0.3252	<0.01	7.82218e+07
Campylobacter	Tannerella	0.3227	<0.01	7.85141e+07
Desulfobulbus	Peptococcus	0.3215	<0.01	7.86491e+07
Dialister	Selenomonas	0.3177	<0.01	7.90854e+07
Dialister	Tannerella	0.3131	<0.01	7.96201e+07
Bacteroides	Dialister	0.313	<0.01	7.96316e+07
Capnocytophaga	Rothia	0.3105	<0.01	7.9922e+07
Rothia	Veillonella	0.3099	<0.01	7.9993e+07
Actinomyces	Streptococcus	0.3098	<0.01	8.00028e+07
Bacteroides	Desulfobulbus	0.3091	<0.01	8.00861e+07
Veillonella	Not_Assigned	0.307	<0.01	8.03308e+07
Parvimonas	Peptococcus	0.3064	<0.01	8.03951e+07
Leptotrichia	Veillonella	0.3046	<0.01	8.0613e+07
Mogibacterium	Tannerella	0.3046	<0.01	8.06075e+07
Kingella	Streptococcus	0.3041	<0.01	8.06722e+07
Leptotrichia	Selenomonas	0.3011	<0.01	8.10094e+07
Actinomyces	Corynebacterium	0.3002	<0.01	8.11158e+07
Rothia	TG5	-0.3042	<0.01	1.51184e+08
Capnocytophaga	Desulfobulbus	-0.3091	<0.01	1.51745e+08
Filifactor	Not_Assigned	-0.3116	<0.01	1.52041e+08
Desulfobulbus	Kingella	-0.325	<0.01	1.53592e+08
TG5	Veillonella	-0.3299	<0.01	1.54162e+08
Kingella	Tannerella	-0.3476	<0.01	1.56212e+08
Treponema	Veillonella	-0.3685	<0.01	1.5863e+08
Capnocytophaga	Treponema	-0.375	<0.01	1.59392e+08
Treponema	Not_Assigned	-0.3761	<0.01	1.5951e+08
Capnocytophaga	TG5	-0.3865	<0.01	1.60723e+08
Kingella	TG5	-0.4239	<0.01	1.65051e+08
Kingella	Treponema	-0.4479	<0.01	1.67842e+08
