# Supplementary material for: Structure and Function of Oral Microbial Community in Periodontitis Based on Integrated Data
Source: Front Cell Infect Microbiol. 2021 Jun 17;11:663756. doi: 10.3389/fcimb.2021.663756 (PMC8248787; doi:10.3389/fcimb.2021.663756)
Supplement: Supplementary file 5 [file Table_4.xlsx]

## Sheet: L2
L2	log2FC	logCPM	Pvalues	FDR
Cell Motility	0.3819	14.092	2.4675e-08	8.6362e-07
Environmental Adaptation	0.10176	10.496	0.0002418	0.0042315
Signal Transduction	0.087304	13.795	0.00059525	0.0057426
Metabolism of Terpenoids and Polyketides	-0.026867	14.146	0.00065629	0.0057426
Metabolism of Cofactors and Vitamins	-0.02879	15.525	0.00090762	0.0057691
Folding, Sorting and Degradation	-0.020633	14.726	0.00098899	0.0057691
Cellular Processes and Signaling	-0.040798	15.158	0.0036001	0.018
Nervous System	-0.078753	9.5907	0.0051096	0.022354
Cell Growth and Death	0.026191	12.543	0.024212	0.094159
Nucleotide Metabolism	-0.019637	15.473	0.035915	0.1257
Replication and Repair	-0.017933	16.537	0.043246	0.13386
Neurodegenerative Diseases	-0.10686	10.953	0.045895	0.13386
Metabolism of Other Amino Acids	-0.017259	13.958	0.062157	0.16001
Glycan Biosynthesis and Metabolism	-0.032625	14.69	0.067972	0.16001
Metabolic Diseases	-0.027414	10.157	0.0704	0.16001
Genetic Information Processing	-0.015016	14.863	0.073149	0.16001
Energy Metabolism	-0.012317	15.806	0.1011	0.20815
Enzyme Families	-0.0093255	14.333	0.11621	0.22509
Immune System	0.10992	9.2789	0.12219	0.22509
Endocrine System	0.032005	11.8	0.19915	0.34851
Metabolism	0.011152	14.543	0.24454	0.40757
Cancers	-0.02606	10.105	0.30366	0.48309
Biosynthesis of Other Secondary Metabolites	-0.01368	12.941	0.36283	0.55213
Digestive System	0.0338	9.3403	0.38746	0.56505
Transport and Catabolism	-0.016561	11.442	0.47304	0.66226
Poorly Characterized	-0.0046431	15.624	0.50493	0.678
Infectious Diseases	0.0087297	11.897	0.52303	0.678
Amino Acid Metabolism	-0.0049795	16.493	0.58838	0.73548
Translation	-0.0033534	16.011	0.74888	0.89971
Signaling Molecules and Interaction	-0.0062838	10.965	0.77118	0.89971
Transcription	-0.0022561	14.401	0.81477	0.90318
Carbohydrate Metabolism	0.0020797	16.548	0.84693	0.90318
Membrane Transport	0.0032111	16.874	0.85157	0.90318
Lipid Metabolism	0.0017912	14.748	0.89254	0.91879
Xenobiotics Biodegradation and Metabolism	0.0018291	14.098	0.94362	0.94362
